# Supplementary material for: Evolution of multiple omics approaches to define pathophysiology of pediatric acute respiratory distress syndrome
Source: eLife. 2022 Aug 1;11:e77405. doi: 10.7554/eLife.77405 (PMC9342956; doi:10.7554/eLife.77405)
Supplement: Figure 3—source data 1. [file elife-77405-fig3-data1.xlsx]

## Sheet: Sheet1
Title: Source Data for Figure 3
COVID-19 Lung Atlas	cell_type_fine/id	ACE	AGER	AGT	AGTR1	ANGPT1	ANGPT2	CARMIL1	CFTR	CXCL8	DEFB1	EGLN1	EPAS1	FER	FLT1	HSPG2	IL17A	IL17B	IL17C	IL17D	IL17F	IL18	IL1R1	IL1R2	IL1RN	IL4	KLK2	LTA	MAP3K1	MAP3K6	MBL2	MUC5B	MYLK	NAMPT	NAMPT	NFE2L2	NFE2L2	PPFIA1	PPFIA2	PPFIA3	PPFIA4	PROC	S100A12	S1PR3	SELP	SFTPA1	SFTPA2	SFTPB	SFTPC
	Airway ciliated	0	0	0	0	0.07	0.23	0.54	0.05	0.01	0	0.09	0.1	0.86	0	0.11	0	0	0	0	0	0.15	0.19	0	0	0.02	0	0	0.15	0.02	0	0.07	0.3	0.16	0.16	0.57	0.57	0.27	0.01	0	0	0	0	0	0	0	0.01	0.18	0.01
	Alveolar macrophages	0.32	0.01	0	0	0	0.17	0.37	0	0.05	0.01	0.18	0.47	0.68	0.14	0	0	0	0	0	0	0.44	0.06	0.12	0.12	0	0	0	0.59	0.03	0	0	0	1.16	1.16	0.75	0.75	0.73	0	0.01	0.01	0	0	0	0	0	0	0.02	0.01
	AT1	0	0.6	0	0	0	0.13	1.09	0.06	0.02	0	0.12	0.53	0.95	0	0.64	0	0	0	0.02	0	0.54	0.26	0	0.01	0	0	0	0.14	0.05	0	0.01	0.05	0.34	0.34	0.6	0.6	0.39	0	0	0.01	0	0	0	0	0.1	0.1	2.4	0.14
	Vascular smooth muscle	0.27	0.1	0.01	0.08	0.83	0.23	0.85	0.04	0.04	0	0.26	2.42	0.99	1.05	0.44	0	0	0	0.01	0	0.12	1.13	0.01	0.01	0	0	0	0.43	0.17	0	0.01	1.04	1.31	1.31	0.63	0.63	0.48	0.1	0.03	0.03	0.01	0	0.09	0.05	0.08	0.09	0.49	0.21
	Airway goblet	0.03	0.02	0	0	0.02	0.21	0.85	0.85	0.21	0.01	0.2	0.67	0.57	0	0.27	0	0	0	0	0	0.11	0.62	0.19	0.05	0	0	0	0.37	0.05	0	1.42	0.02	0.67	0.67	0.61	0.61	0.37	0	0.03	0.01	0.01	0	0	0	0.08	0.19	1.56	0.05
	AT2	0	0.02	0	0	0	0.12	0.8	0.48	0.03	0	0.12	0.84	0.7	0	0.34	0	0	0	0	0	0.11	0.66	0	0	0	0	0	0.15	0.06	0	0.03	0.07	0.82	0.82	0.39	0.39	0.38	0.04	0.01	0	0	0	0.01	0	1.26	1.25	4.74	2.15
	Monocyte-derived macrophages	0.16	0	0	0	0	0.11	0.61	0	0.03	0	0.17	0.28	0.76	0.04	0	0	0	0	0	0	0.41	0.06	0.14	0.02	0	0	0	0.59	0.03	0	0	0	1.22	1.22	0.66	0.66	0.5	0	0	0.01	0	0	0	0	0	0	0	0.01
	Mesothelial FB	0.02	0.03	0	0.01	0.06	0.14	1.03	0.14	0.06	0	0.34	0.56	0.95	0.05	0.51	0	0.02	0	0.01	0	0.19	1.4	0.01	0.01	0	0.01	0	0.2	0.05	0	0	0.52	1.99	1.99	0.31	0.31	0.49	0.11	0.02	0.03	0	0.01	0.06	0.03	0.01	0.02	0.16	0.01
	Dendritic cells	0.04	0	0	0	0	0.14	0.9	0	0.01	0	0.18	0.09	0.45	0.19	0.01	0	0	0	0	0	0.35	0.17	0.44	0.01	0	0	0	0.7	0.02	0	0	0.03	1.07	1.07	0.63	0.63	0.36	0	0	0.01	0.01	0	0.01	0.01	0	0.01	0.02	0.01
	Cycling NK/T cells	0.04	0.02	0	0.02	0.01	0.19	0.3	0.05	0.01	0	0.19	0.13	0.3	0.04	0.06	0	0	0	0	0	0.11	0.06	0.09	0.01	0	0	0	0.5	0.03	0	0.07	0.01	0.38	0.38	0.43	0.43	0.46	0	0.01	0	0	0	0	0	0.06	0.07	0.19	0.05
	Endothelial cells (other)	0.27	0.05	0.01	0	0.09	0.18	0.32	0.01	0.01	0	0.17	2.68	0.76	1.24	0.46	0	0.01	0	0	0	0.04	0.56	0.04	0.01	0	0	0	0.43	0.21	0	0	0.24	1.09	1.09	0.38	0.38	0.34	0.03	0.02	0.01	0	0	0.01	0.05	0	0.03	0.24	0.02
	Adventitial FB	0	0	0.01	0.07	0.18	0.13	1.35	0.02	0	0	0.19	0.3	0.94	0.01	0.39	0	0	0	0.02	0	0.06	1.29	0	0	0	0	0	0.15	0.07	0	0	0.32	1.84	1.84	0.6	0.6	0.37	0.13	0.01	0.02	0	0	0.03	0	0	0	0.02	0
	Airway club	0	0.01	0	0	0.01	0.14	0.56	0.6	0.1	0	0.11	0.67	0.73	0.01	0.25	0	0	0	0	0	0.08	0.85	0	0	0	0	0	0.22	0.06	0	0.06	0.02	0.81	0.81	0.45	0.45	0.34	0.01	0.01	0.01	0	0	0.01	0	0.42	0.56	4.65	0.26
	Other FB	0	0	0	0.02	0.72	0.11	0.68	0.01	0	0	0.12	0.25	0.75	0.01	0.31	0	0	0	0.01	0	0.04	0.94	0	0	0	0	0	0.13	0.05	0	0	0.97	0.68	0.68	0.39	0.39	0.34	0.46	0	0.01	0.01	0	0.03	0	0.01	0	0.03	0.01
	Intermediate pathological FB	0	0	0	0.04	0.57	0.1	0.91	0.01	0	0	0.2	0.56	0.9	0.01	0.42	0	0	0	0.01	0	0.02	2.01	0	0	0	0	0	0.2	0.04	0	0	1.04	1.62	1.62	0.46	0.46	0.39	0.31	0.01	0.04	0	0	0.03	0	0.01	0.01	0.04	0.01
	ECM-high epithelial	0.03	0.15	0	0.02	0.11	0.13	0.72	0.11	0.07	0	0.1	0.8	0.64	0.12	0.36	0	0	0	0.01	0	0.26	0.87	0.05	0.03	0	0	0	0.33	0.06	0	0.02	0.22	1.34	1.34	0.51	0.51	0.35	0.04	0.01	0.01	0	0	0.02	0.02	0.5	0.31	2.41	0.5
	Tuft-like	0.05	0.05	0	0	0.03	0.24	0.53	0.45	0.29	0	0.17	0.92	0.5	0	0.29	0	0	0	0	0	0.1	0.88	0.18	0.07	0	0	0	0.28	0.07	0	1.24	0.04	0.81	0.81	0.56	0.56	0.44	0	0.05	0	0.02	0	0.01	0	0.41	0.5	2.48	0.13
	Airway basal	0.01	0.03	0	0	0.04	0.26	0.61	0.28	0.18	0	0.16	1.21	0.79	0	0.39	0.01	0	0	0	0	0.2	1.24	0.01	0.01	0	0	0	0.34	0.07	0	0.06	0.17	1	1	0.69	0.69	0.31	0.02	0.01	0.01	0.01	0	0.01	0	0.12	0.19	1.97	0.07
	Mast cells	0	0	0	0	0.01	0.18	0.31	0.05	0	0	0.16	0.3	2.92	0.03	0.15	0	0	0	0	0	0.32	0.01	0.02	0	0	0	0	0.56	0.01	0	0.01	0.03	0.28	0.28	0.41	0.41	0.15	0	0	0.02	0	0	0	0	0	0	0.01	0.02
	Alveolar FB	0	0	0	0.05	1.15	0.07	1.28	0.01	0	0	0.13	0.26	0.83	0.01	0.19	0	0	0	0.01	0	0.03	1.21	0	0	0	0	0	0.15	0.05	0	0	1.31	1.24	1.24	0.36	0.36	0.33	0.12	0.01	0.03	0	0	0.02	0	0.01	0.01	0.04	0.01
	Arterial endothelial cells	0.24	0.03	0	0	0.01	0.22	0.35	0.01	0.02	0	0.1	3.03	0.74	1.84	1.04	0	0	0	0	0	0.01	0.41	0.01	0	0	0	0	0.29	0.21	0	0	0.03	1.51	1.51	0.55	0.55	0.26	0	0.03	0.01	0	0	0	0.24	0	0	0.02	0
	Neuronal cells	0.01	0.01	0	0	0.02	1.12	0.19	0.02	0.01	0	0.25	0.4	0.95	0.03	0.72	0	0	0	0	0	0.02	0.19	0.01	0	0	0	0	0.7	0.02	0	0	0.03	0.89	0.89	0.44	0.44	0.32	0.01	0.01	0	0	0	0.01	0	0.01	0.01	0.07	0.04
	Plasma cells	0	0	0	0	0	0.17	1.12	0	0	0	0.16	0.01	0.48	0	0.01	0	0	0	0	0	0.02	0	0	0	0	0	0	0.55	0.01	0	0	0	0.1	0.1	0.27	0.27	0.37	0	0.02	0	0	0	0	0	0	0	0.01	0.01
	Cycling epithelial	0.03	0.02	0	0	0.05	0.14	0.32	0.15	0.02	0.01	0.14	0.24	0.19	0.04	0.1	0	0	0	0.01	0	0.07	0.16	0.08	0.02	0	0	0	0.31	0.03	0	0.29	0.07	0.35	0.35	0.41	0.41	0.34	0	0.01	0	0	0	0.01	0	0.19	0.24	0.62	0.23
	Monocytes	0.02	0.01	0	0	0	0.08	0.4	0	0.01	0	0.16	0.03	0.43	0.09	0	0	0	0	0	0	0.17	0.01	0.4	0.01	0	0	0	0.97	0.03	0	0	0	1.34	1.34	0.49	0.49	0.44	0	0	0.01	0	0.01	0.02	0	0	0	0	0.01
	NK cells	0	0	0	0	0	0.17	0.03	0	0	0	0.13	0.01	0.19	0	0	0	0	0	0	0	0.02	0	0	0	0	0	0	0.29	0	0	0	0	0.04	0.04	0.46	0.46	0.23	0	0	0	0	0	0	0.01	0	0	0	0
	Airway smooth muscle	0	0	0.01	0.02	0.48	0.12	0.96	0	0	0	0.12	0.5	0.74	0.03	0.38	0	0	0	0	0	0.02	0.45	0	0	0	0	0	0.13	0.05	0	0.01	1.13	0.97	0.97	0.35	0.35	0.3	0.59	0.01	0.01	0	0	0.08	0	0	0.01	0.04	0.04
	Airway mucous	0.03	0.02	0	0	0	0.12	0.72	0.36	0.02	0	0.17	0.22	0.42	0.01	0.32	0	0	0	0.01	0	0.09	0.18	0.19	0.03	0	0	0	0.26	0.05	0	0.99	0.04	0.46	0.46	0.49	0.49	0.3	0	0.02	0.02	0.01	0	0.01	0.01	0.05	0.04	0.54	0.06
	Transitioning MDM	0.08	0	0	0	0.01	0.06	0.28	0	0.03	0	0.12	0.2	0.5	0.06	0.01	0	0	0	0	0	0.22	0.08	0.22	0.01	0	0	0	0.5	0.02	0	0	0	1.56	1.56	0.58	0.58	0.43	0	0	0.01	0	0	0	0	0	0	0.05	0.01
	Endothelial cells (general)	0.14	0	0	0	0.03	0.15	0.04	0	0	0	0.12	3.36	0.75	1.45	0.34	0	0	0	0	0	0.01	0.3	0.01	0	0	0	0	0.22	0.27	0	0	0.18	0.71	0.71	0.41	0.41	0.24	0	0.01	0	0	0	0	0.02	0	0	0.02	0.01
	Pericytes	0.03	0.01	0	0.25	0.37	0.18	0.91	0.02	0.01	0	0.18	1.02	0.89	0.14	0.16	0	0	0	0.01	0	0.04	0.45	0	0	0	0	0	0.25	0.05	0	0	0.52	0.87	0.87	0.32	0.32	0.26	0.17	0.01	0	0	0	0.08	0	0	0.02	0.13	0.03
	Pulmonary venous endothelial cells	0.01	0.01	0	0	0.02	0.16	0.5	0	0.01	0	0.23	2.38	0.65	1.11	1.08	0	0	0	0	0	0.01	2.14	0.02	0	0	0	0	0.19	0.25	0	0	0.07	2.07	2.07	0.51	0.51	0.27	0.01	0.03	0	0	0.01	0	0.47	0.01	0	0.01	0.01
	Capillary endothelial cells	0.53	0	0	0	0.02	0.2	0.03	0	0	0	0.13	2.79	0.81	1.46	0.04	0	0	0	0	0	0.02	0.08	0	0	0	0	0	0.22	0.15	0	0	0.5	0.23	0.23	0.39	0.39	0.24	0	0.04	0	0	0	0	0	0	0	0.01	0.01
	CD4+ T cells	0	0	0	0	0	0.13	0.07	0	0	0	0.15	0	0.15	0	0	0	0	0	0	0	0	0.01	0	0	0	0	0	0.45	0	0	0	0	0.06	0.06	0.3	0.3	0.25	0	0	0	0	0	0	0.01	0	0	0.01	0
	Activated B cells	0.01	0.01	0	0	0.01	0.24	1.31	0	0	0	0.13	0.02	0.4	0.01	0	0	0	0	0	0	0.01	0.03	0.02	0	0	0	0	0.74	0	0	0	0.02	0.13	0.13	0.28	0.28	0.29	0	0	0	0	0	0	0.01	0	0	0.03	0.02
	Tregs	0	0	0	0	0	0.12	0.14	0	0	0	0.18	0	0.1	0	0	0	0	0	0	0	0.01	0.08	0.04	0	0	0	0.02	0.74	0	0	0	0	0.16	0.16	0.38	0.38	0.19	0	0	0	0	0	0	0.07	0	0	0	0
	B cells	0	0	0	0	0	0.28	0.84	0	0	0	0.12	0	0.48	0.02	0.01	0	0	0	0	0	0.01	0	0	0	0	0	0	0.89	0.01	0	0	0	0.02	0.02	0.24	0.24	0.16	0	0	0.01	0	0	0	0.01	0	0	0.02	0
	Inflamed endothelial cells	0.18	0.01	0	0	0.01	0.32	0.06	0	0.04	0	0.15	2.14	0.72	1.47	0.39	0	0	0	0	0	0.02	0.18	0	0	0	0	0	0.32	0.11	0	0	0.25	0.63	0.63	0.51	0.51	0.28	0.01	0	0	0	0	0	0.02	0.01	0.01	0.07	0.01
	CD8+ T cells	0	0	0	0	0	0.13	0.04	0	0	0	0.16	0	0.11	0	0	0	0	0	0	0	0	0	0	0	0	0	0	0.28	0	0	0	0	0.05	0.05	0.31	0.31	0.25	0	0	0	0	0	0	0	0	0	0	0
	Pathological FB	0.02	0.01	0.01	0.02	0.47	0.07	0.44	0	0.01	0	0.12	0.79	0.48	0.03	0.5	0	0	0	0.01	0	0.02	1.54	0.01	0.01	0	0	0	0.15	0.05	0	0	0.87	1.33	1.33	0.33	0.33	0.28	0.11	0.02	0.01	0	0	0.06	0	0.04	0.03	0.15	0.05
	Systemic venous endothelial cells	0.08	0.02	0	0	0	0.57	0.66	0.02	0	0	0.64	1.66	0.75	1.45	1.52	0	0	0	0	0	0.01	0.87	0	0	0	0	0	0.2	0.17	0	0	0.13	1.59	1.59	0.33	0.33	0.25	0.01	0.02	0	0	0	0	0.22	0.01	0.01	0.01	0
PMBC	CellType/id	ACE	AGER	AGT	AGTR1	ANGPT1	ANGPT2		CFTR	CXCL8	DEFB1	EGLN1	EPAS1	FER	FLT1	HSPG2	IL17A	IL17B	IL17C	IL17D	IL17F	IL18	IL1R1	IL1R2	IL1RN	IL4	KLK2	LTA	MAP3K1	MAP3K6	MBL2	MUC5B	MYLK	NAMPT	NAMPT	NFE2L2	NFE2L2	PPFIA1	PPFIA2	PPFIA3	PPFIA4	PROC	S100A12	S1PR3	SELP	SFTPA1	SFTPA2	SFTPB	SFTPC
	B cell	0.02	0.02	0	0	0	0.04		0	0.02	0	0.06	0.01	0.04	0.01	0	0	0	0	0	0	0.01	0.01	0	0	0	0.01	0.03	0.34	0.01	0	0	0.02	0.11	0.11	0.13	0.13	0.07	0	0	0	0	0.01	0.03	0	0	0	0.01	0
	Plasmacytoid dendritic cell	0	0.05	0	0	0	0.02		0	0.03	0	0.04	0	0.04	0.04	0.05	0	0	0	0	0	0.07	0.02	0	0.01	0	0	0.01	0.18	0	0	0	0.02	0.37	0.37	0.19	0.19	0.04	0	0	0	0.23	0.03	0.02	0	0	0	0	0
	CD4+ T cell	0.03	0.03	0	0	0	0.03		0	0.01	0	0.07	0	0.04	0.01	0	0	0	0	0	0	0.01	0.01	0	0	0	0.01	0.04	0.25	0.02	0	0	0.01	0.11	0.11	0.22	0.22	0.08	0	0	0	0	0.01	0.02	0	0	0	0.01	0
	Natural killer cell	0.01	0.03	0	0	0	0.04		0	0.01	0	0.1	0.01	0.04	0.01	0	0	0	0.01	0	0	0.04	0.01	0	0	0	0.01	0.02	0.08	0.02	0	0	0.01	0.07	0.07	0.18	0.18	0.07	0	0	0	0	0.01	0.02	0	0	0	0.02	0
	Cytotoxic T cell	0.01	0.02	0	0	0	0.03		0	0.02	0	0.1	0.01	0.03	0.01	0	0	0	0	0	0	0.01	0	0	0	0	0	0.02	0.11	0.02	0	0	0.01	0.09	0.09	0.15	0.15	0.07	0	0	0	0	0.01	0.02	0	0	0	0.01	0
	Megakaryocyte	0	0	0	0	0.02	0		0	0.02	0	0	0	0.01	0	0	0	0	0	0	0	0	0	0	0	0	0	0.01	0.02	0	0	0	0.37	0.02	0.02	0.04	0.04	0.01	0	0	0	0	0.03	0	0.19	0	0	0	0
	CD14+ monocyte	0.01	0.04	0	0	0	0.02		0	0.62	0	0.09	0	0.03	0.01	0	0	0	0	0	0	0.05	0.02	0.01	0.12	0	0	0	0.46	0.01	0	0	0.02	1.01	1.01	0.21	0.21	0.08	0	0	0	0	1	0.1	0	0	0	0	0
	CD16+ monocyte	0.03	0.03	0	0	0	0.03		0	0.05	0	0.12	0	0.03	0.01	0	0	0	0	0	0	0.02	0.01	0	0.04	0	0.01	0.01	0.64	0.02	0	0	0.02	1.04	1.04	0.25	0.25	0.09	0	0	0	0	0.04	0.04	0	0	0	0.01	0
	Dendritic cell	0.01	0.02	0	0	0	0.03		0	0.15	0	0.1	0	0.05	0.01	0.01	0	0	0	0	0	0.23	0.02	0.11	0.08	0	0.01	0	0.23	0.04	0	0	0.05	0.47	0.47	0.32	0.32	0.09	0	0	0	0.04	0.22	0.01	0	0	0	0.01	0
	Unassigned	0	0	0	0	0	0		0	0.24	0	0.02	0	0.05	0	0.07	0	0	0	0	0	0.08	0	0	0	0	0	0	0.21	0	0	0	0.1	0.31	0.31	0.18	0.18	0.14	0	0	0	0	0	0	0	0	0	0	0
[truncated: 7 more columns]
